# Supplementary material for: Norepinephrine transporter promotes the invasion of human colon cancer cells
Source: PubMed Central journal article supplement — Oncol Lett. 2019 Nov 25;19(1):824–32. doi: 10.3892/ol.2019.11146 (PMC6924147; doi:10.3892/ol.2019.11146), 2019-11-25
Supplement: Supplementary_Data.pdf [file Supplementary_Data.pdf]

Figure S1. Knockdown of NET has no effect on colon cancer cell viability. HCT116 and SW480 cells were treated with NET-targeting siRNAs (siNET1 and siNET2) or negative control siRNA (siNC) for 24 h. MTT assay was performed to determine the changes in cell viability. NET, norepinephrine transporter; siRNA, small interfering RNA.

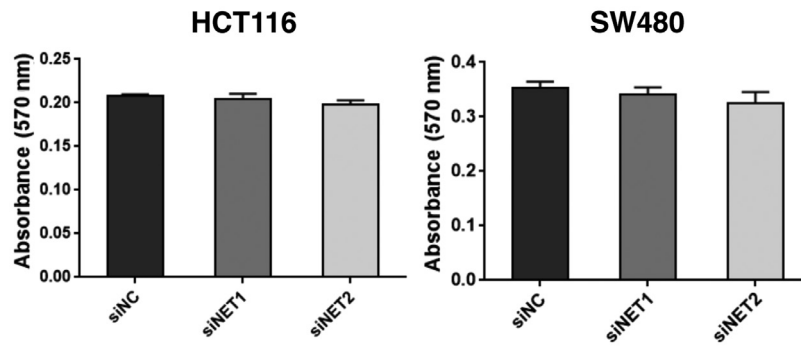

Table SI. Association between clinicopathological characteristics and NET expression of patients with colorectal cancer.

| Characteristics       | Number of cases (n=35) | P-value |
|-----------------------|------------------------|---------|
| Gender                |                        | 0.571   |
| Male                  | 24                     |         |
| Female                | 11                     |         |
| Age (years)           |                        | 0.326   |
| ≥60                   | 21                     |         |
| <60                   | 14                     |         |
| Tumor location        |                        | 0.115   |
| Colon                 | 22                     |         |
| Rectum                | 13                     |         |
| TNM stage             |                        |         |
| I vs. II              | 5 vs. 16               | 0.078   |
| I vs. III             | 5 vs. 8                | 0.038   |
| I vs. IV              | 5 vs. 6                | 0.025   |
| II vs. III            | 16 vs. 8               | 0.052   |
| II vs. IV             | 16 vs. 6               | 0.064   |
| III vs. IV            | 8 vs. 6                | 0.058   |
| Tumor topography      |                        |         |
| T2 vs. T3             | 5 vs. 25               | 0.120   |
| T2 vs. T4             | 5 vs. 5                | 0.150   |
| T3 vs. T4             | 25 vs. 5               | 0.697   |
| Lymph node metastasis |                        | 0.015   |
| N0                    | 20                     |         |
| N1                    | 15                     |         |
| Distant metastasis    |                        | 0.025   |
| M0                    | 25                     |         |
| M1                    | 10                     |         |

Analyzed by one-way analysis of variance and Tamhane's T2 post hoc test. TNM, Tumor-Node-Metastasis.
